# Supplementary material for: Carbohydrate and steroid analysis by desorption electrospray ionization mass spectrometry
Source: Royal Society of Chemistry journal article supplement (doi:10.1039/b804413a), 2008-01-01
Supplement: b804413a.pdf [file b804413a.pdf]

**Supporting Information**

**Analysis of Carbohydrates and Steroids by Desorption  
Electrospray Ionization Mass Spectrometry**

**Tiina J. Kauppila,<sup>a</sup> Nari Talaty,<sup>b</sup> Ayanna U. Jackson,<sup>b</sup> Tapio Kotiaho,<sup>a, c</sup> Risto Kostinen<sup>\*a</sup>  
and R. Graham Cooks<sup>\*b</sup>**

Faculty of Pharmacy, University of Helsinki, 00014 Helsinki, Finland

<sup>b</sup> Department of Chemistry, Purdue University, West Lafayette, IN 47907, USA. E-mail: [cooks@purdue.edu](mailto:cooks@purdue.edu)

<sup>c</sup> Department of Chemistry, University of Helsinki, 00014 Helsinki, Finland

**Abstract:** Additional information is provided including a table of solvent systems studied, tables of the ions observed in the xylose and cortisone spectra with the different spray solvent systems, structures of the compounds studied and graphs illustrating the optimization of the solvent system in the positive and negative ion modes.

**Table S1** Solvent systems studied.

|                   | Solvent                           | Salt<br>Concentration | Monitored<br>Ion                                                           |
|-------------------|-----------------------------------|-----------------------|----------------------------------------------------------------------------|
| Positive ion mode |                                   |                       |                                                                            |
| 1                 | water/methanol/formic acid        | 0.1%                  | [M+H] <sup>+</sup>                                                         |
| 2                 | water/methanol/lithium chloride   | 100 μM                | [M+Li] <sup>+</sup>                                                        |
| 3                 | water/methanol/sodium chloride    | 100 μM                | [M+Na] <sup>+</sup>                                                        |
| 4                 | water/methanol/potassium chloride | 100 μM                | [M+K] <sup>+</sup>                                                         |
| 5                 | water/methanol/silver nitrate     | 100 μM                | [M+Ag] <sup>+</sup>                                                        |
| 6                 | water/methanol/ammonium acetate   | 100 μM                | [M+NH <sub>4</sub> ] <sup>+</sup>                                          |
| Negative ion mode |                                   |                       |                                                                            |
| 1                 | water/methanol/ammonium hydroxide | 0.1%                  | [M-H] <sup>-</sup>                                                         |
| 2                 | water/methanol/chloroform         | 3/6/1                 | [M+Cl] <sup>-</sup>                                                        |
| 3                 | water/methanol/ammonium chloride  | 10 μM                 | [M+Cl] <sup>-</sup>                                                        |
| 4                 | water/methanol/ammonium bromide   | 10 μM                 | [M+Br] <sup>-</sup>                                                        |
| 5                 | water/methanol/formic acid        | 0.01%                 | [M+CHOO] <sup>-</sup>                                                      |
| 6                 | water/methanol/acetic acid        | 0.01%                 | [M+CH <sub>3</sub> COO] <sup>-</sup>                                       |
| 7                 | water/methanol/sulfuric acid      | 10 μM                 | [M+HSO <sub>4</sub> ] <sup>-</sup> ,<br>[M+SO <sub>4</sub> ] <sup>2-</sup> |
| 8                 | water/methanol/ammonium nitrate   | 100 μM                | [M+NO <sub>3</sub> ] <sup>-</sup>                                          |

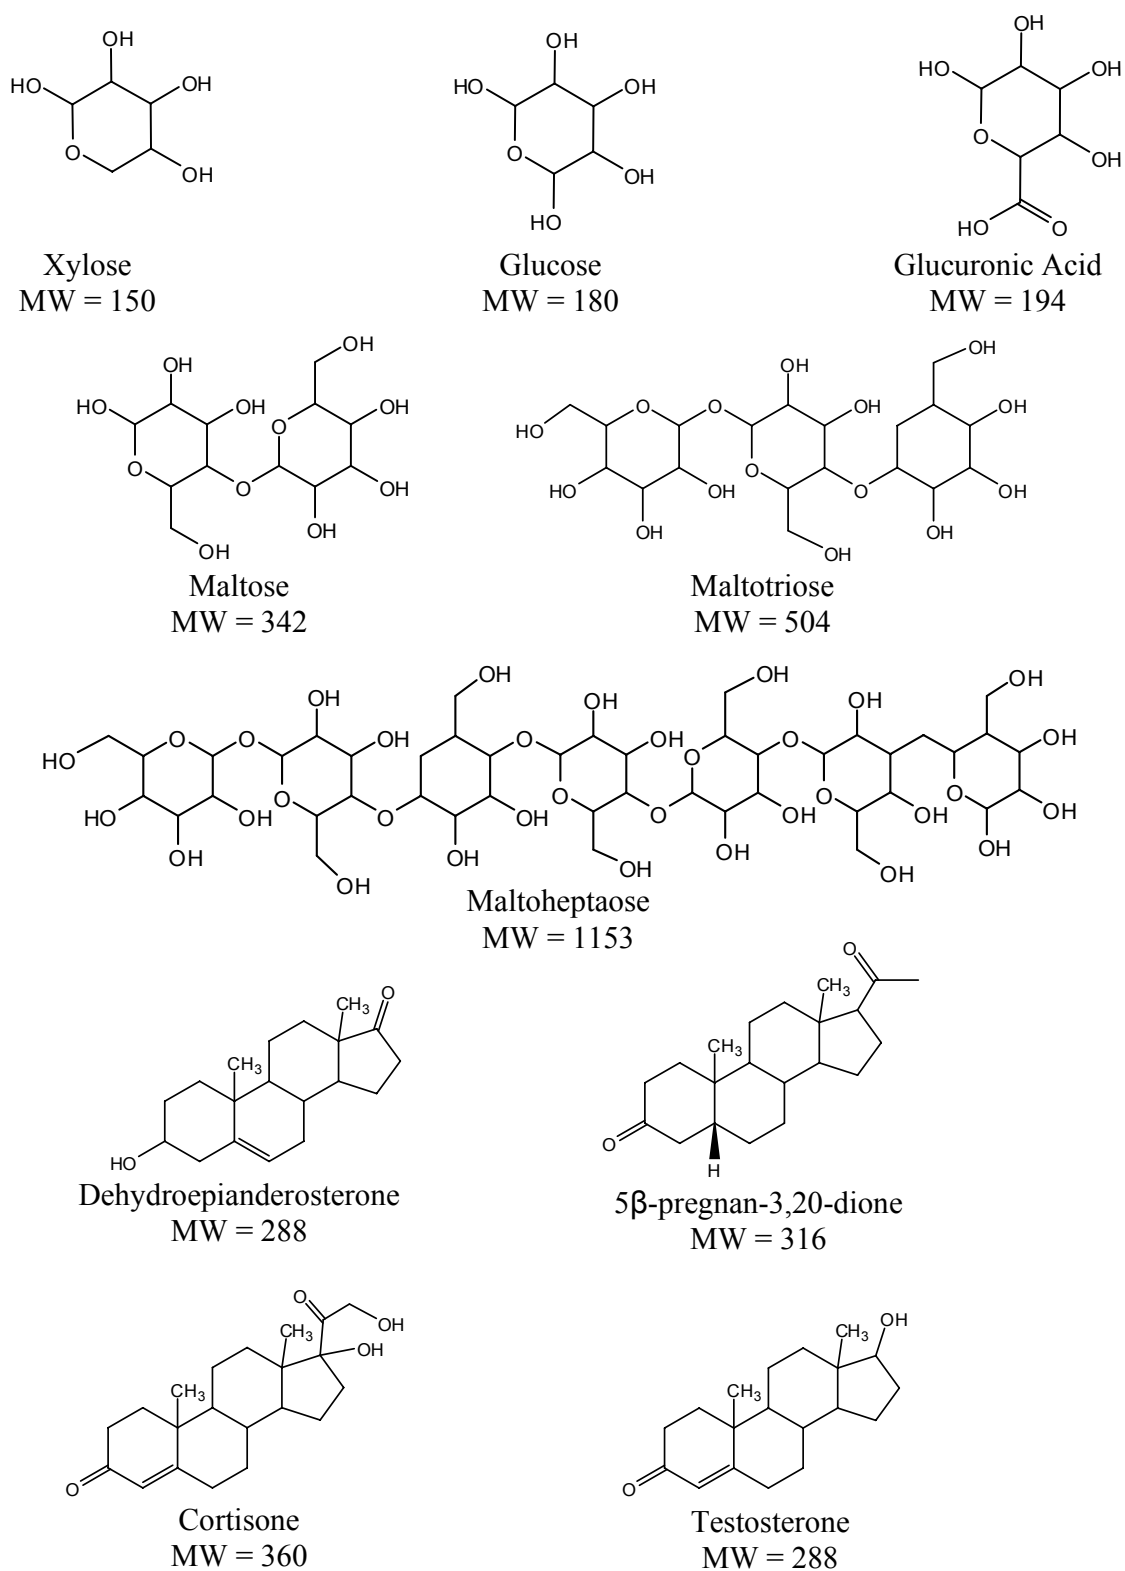

**Figure S1** Structures of the compounds studied

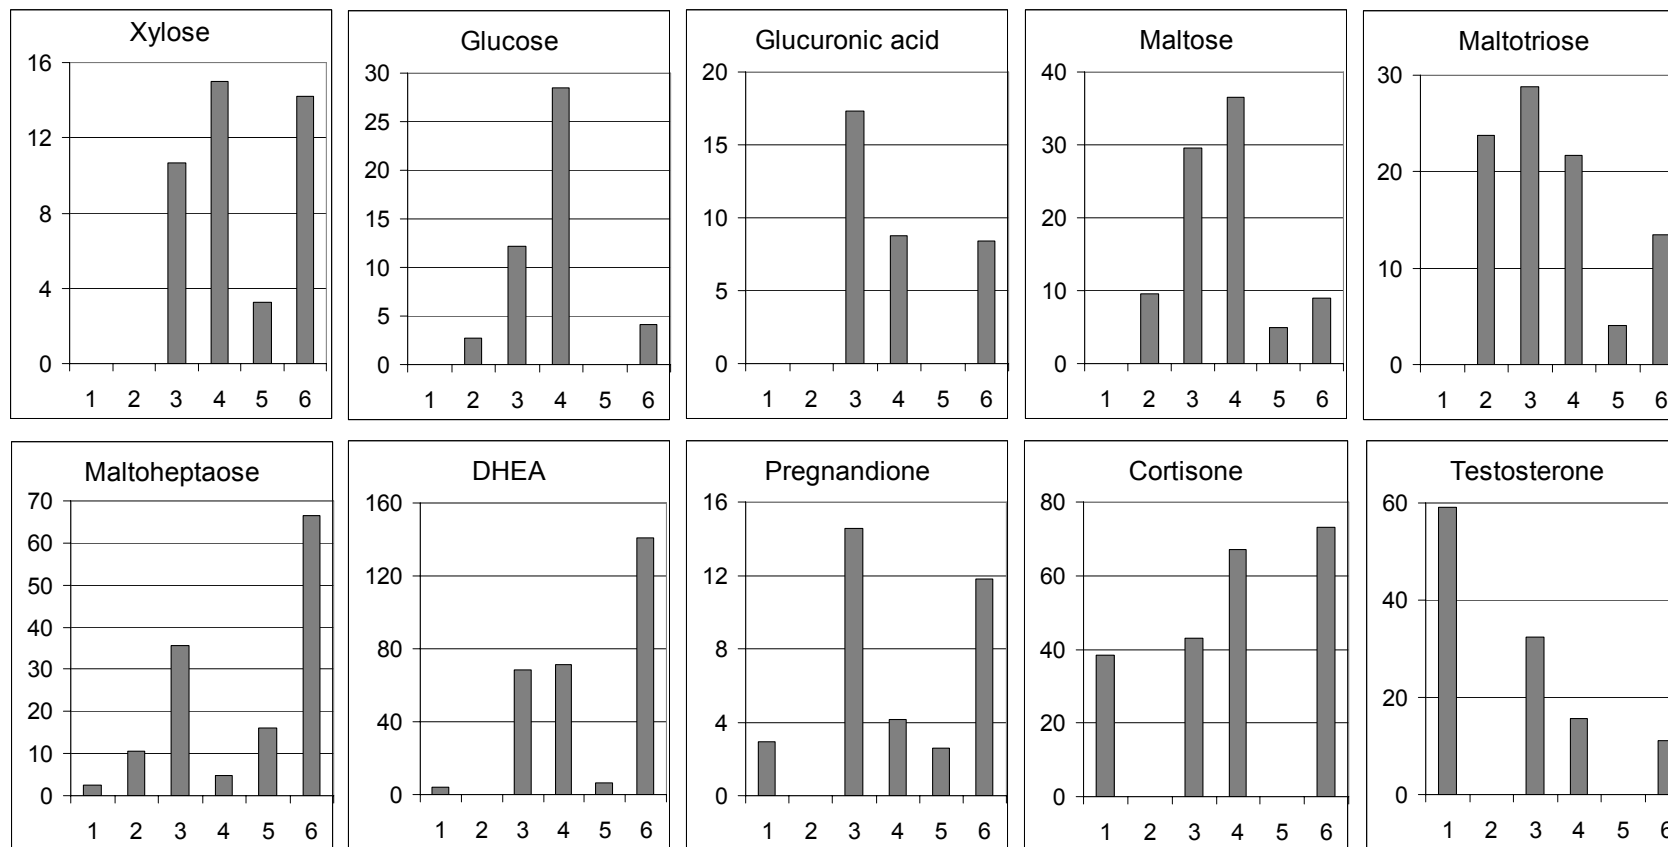

**Figure S2** Positive ion mode DESI signal-to-noise ratios of the analyte ions using different spray solvents. Solvents: 1. H<sub>2</sub>O/MeOH/HCOOH (0.1%), 2. H<sub>2</sub>O/MeOH/LiCl (100 μM), 3. H<sub>2</sub>O/MeOH/NaCl (100 μM), 4. H<sub>2</sub>O/MeOH/KCl (100 μM), 5. H<sub>2</sub>O/MeOH/AgNO<sub>3</sub> (100 μM), 6. H<sub>2</sub>O/MeOH/CH<sub>3</sub>COONH<sub>4</sub> (100 μM). DESI analysis of 0.5 μL of analyte (10 μM – 10 mM depending on ionization efficiency) from a teflon substrate

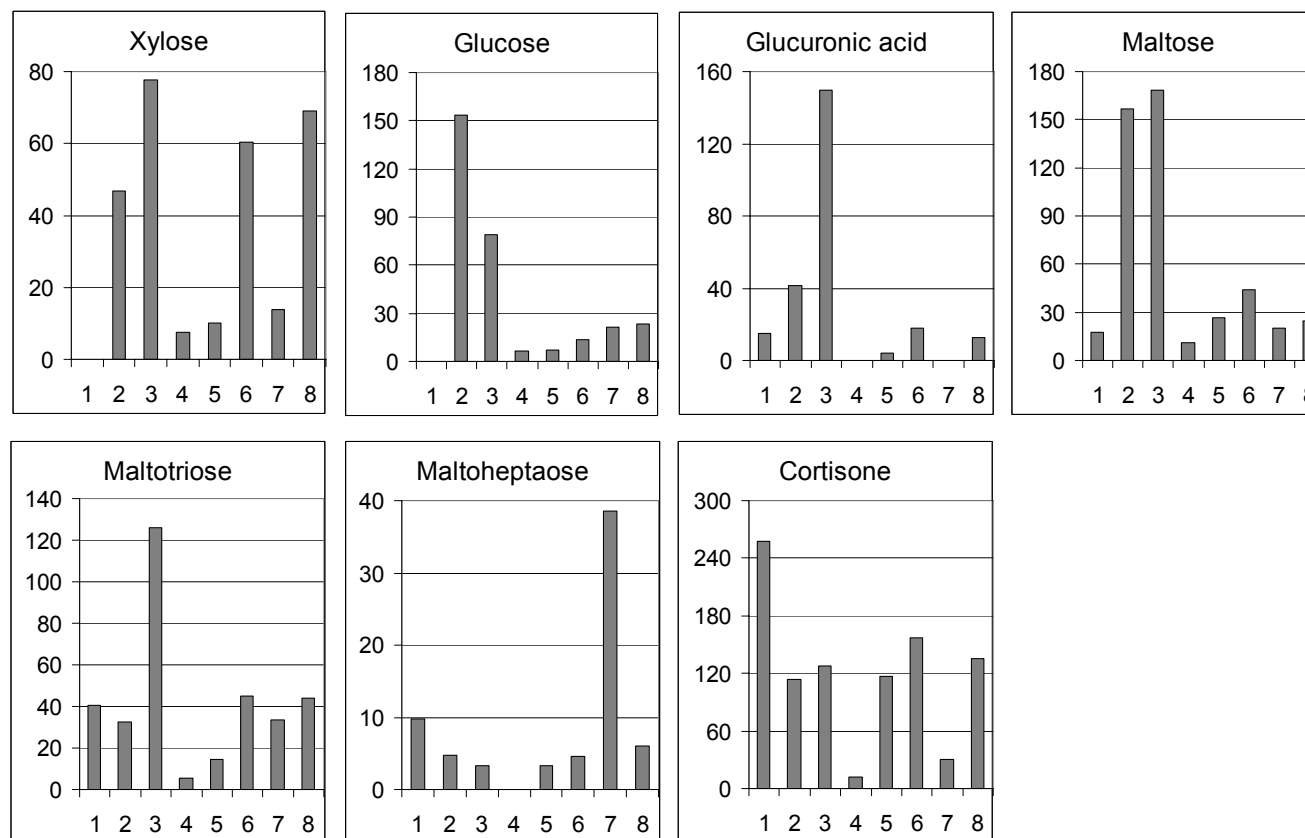

**Figure S3** Negative ion mode DESI signal-to-noise ratios of the analyte ions using different spray solvents. Solvents: 1. H<sub>2</sub>O/MeOH/NH<sub>4</sub>OH (0.1%), 2. H<sub>2</sub>O/MeOH/CHCl<sub>3</sub> (3/6/1), 3. H<sub>2</sub>O/MeOH/NH<sub>4</sub>Cl (10 μM), 4. H<sub>2</sub>O/MeOH/NH<sub>4</sub>Br (10 μM), 5. H<sub>2</sub>O/MeOH/CHOOH (0.01%), 6. H<sub>2</sub>O/MeOH/CH<sub>3</sub>COOH (0.01%), 7. H<sub>2</sub>O/MeOH/H<sub>2</sub>SO<sub>4</sub> (10 μM), 8. H<sub>2</sub>O/MeOH/NH<sub>4</sub>NO<sub>3</sub> (100 μM). DESI analysis of 0.5 μL of analyte (10 μM – 10 mM depending on ionization efficiency) from a teflon substrate

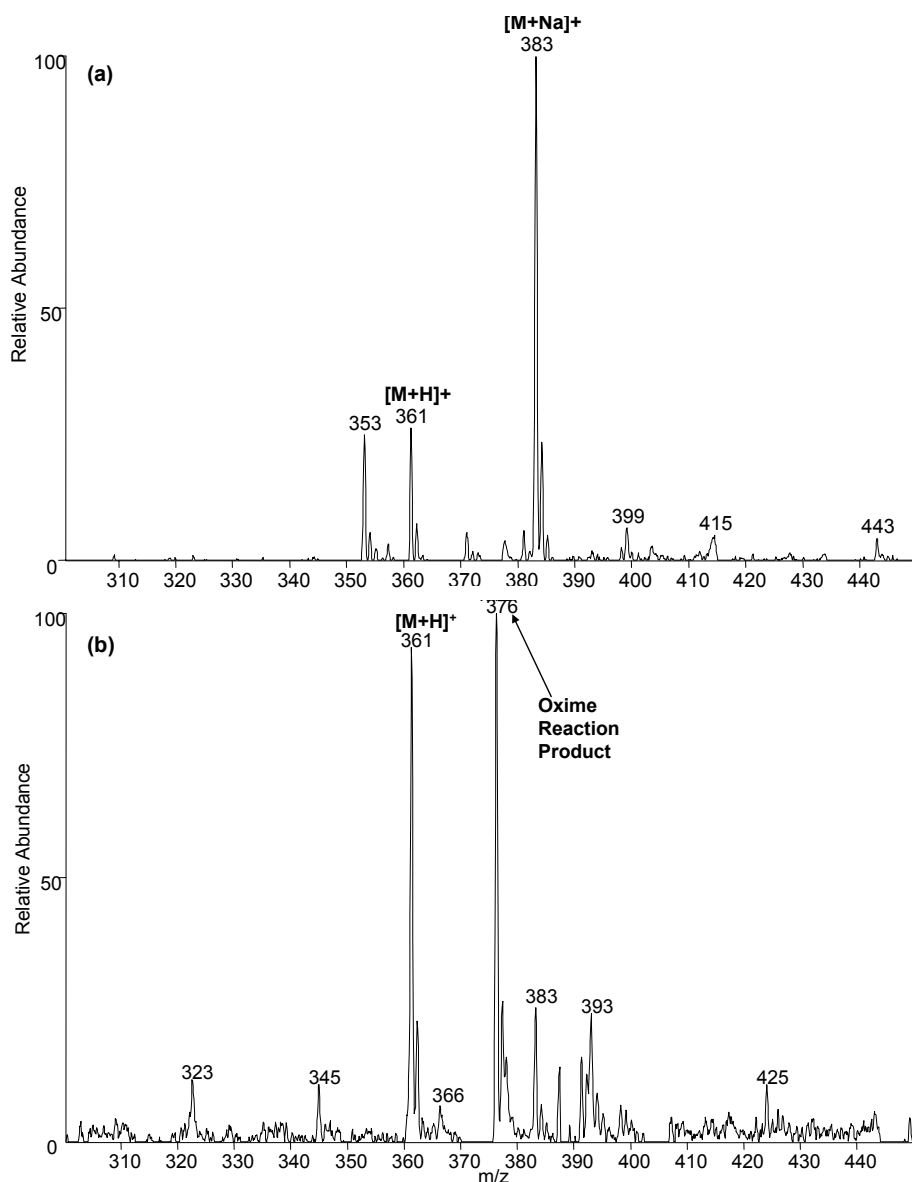

**Figure S4** Comparison of (a) adduct formation using MeOH/H<sub>2</sub>O/NaCl (10 μM) and (b) reactive DESI using MeOH/H<sub>2</sub>O/CH<sub>3</sub>COOH (0.05%)/NH<sub>2</sub>OH (5%) in the direct analysis of cortisone (1 mM) in positive ion mode from teflon. Simple salt adduct formation resulted in a higher signal intensity and somewhat better signal to noise ratios than did reaction to form the oxime product. Both spectra have been background subtracted for comparison
